# Supplementary material for: A Novel Role for DOC2B in Ameliorating Palmitate-Induced Glucose Uptake Dysfunction in Skeletal Muscle Cells via a Mechanism Involving β-AR Agonism and Cofilin
Source: MDPI journal article supplement (doi:10.3390/ijms25010137), 2023-12-21
Supplement: s1 [file s1]

## **SUPPLEMENTAL MATERIALS**

# **A novel role for DOC2B in ameliorating palmitate-induced glucose uptake dysfunction in skeletal muscle cells, via a mechanism involving $\beta$ -AR agonism and cofilin**

**Jinhee Hwang<sup>1,2</sup>, Rekha Balakrishnan<sup>1</sup>, Eunjin Oh<sup>1</sup>, Rajakrishnan Veluthakal<sup>1</sup>, and Debbie C. Thurmond<sup>1\*</sup>**

**1 Department of Molecular and Cellular Endocrinology, Arthur Riggs Diabetes and Metabolism Research Institute, Beckman Research Institute at City of Hope, Duarte, CA 91010, USA; jihwnag@korea.ac.kr (J.H.); rbalakrishnan@coh.org (R.B.); euoh@coh.org (E.O.); rveluthakal@coh.org (R.V.)**

**2 Department of Food and Biotechnology, College of Science and Technology, Korea University, Sejong 30019, Republic of Korea**

**\* Correspondence: dthurmond@coh.org; Tel.: +1-626-218-0190; Fax: +1-626-256-8704**

## **TABLE OF CONTENTS**

|                              |   |
|------------------------------|---|
| Supplementary Table S1.....  | 2 |
| Supplemental Figure S1 ..... | 3 |
| Supplemental Figure S2 ..... | 4 |
| Supplemental Figure S3 ..... | 5 |
| Supplementary Methods .....  | 6 |
| Supplemental reference:..... | 8 |

**Supplementary Table S1.**

Primer sequences used for quantitative real-time PCR.

| Species | Gene  | Forward primer (5' to 3') | Reverse primer (5' to 3') |
|---------|-------|---------------------------|---------------------------|
| Mouse   | DOC2B | CCAGCAAGGCAAATAAGCTC      | ATTGGGCTTCAGCTTCTTCA      |
|         | ADRB1 | AGACCGAAAGCAGGTGAATG      | ACTCTCCCAACTCCTCCTAAA     |
|         | ADRB2 | ACTCTGCCTTCAATCCTCTTATC   | GTAGCCGTTCCCATAGGTTT      |
|         | ADRB3 | TCCCTTTCTTCCTACTGCTTTC    | CTGGATTCTGCTCTCAAACCT     |
|         | HPRT  | AAGCCTAAGATGAGCGCAAG      | TTACTAGGCAGATGGCCACA      |
| Rat     | DOC2B | CCAGCAAGGCAAATAAGCTC      | GTTGGGTTTCAGCTTCTTCA      |
|         | ADRB1 | CGTCCGTCGTCTCCTTCTA       | GCAGCTGTCGATCTTCTTCA      |
|         | ADRB2 | GCTATCGCTTCCTCTATCGTATC   | GCCCTCGGATTTGTCTATCTT     |
|         | ADRB3 | GCTGTTCTTTGCCTCCAATA      | GAGCATAGACGAAGAGCATCAC    |
|         | HPRT  | GGTCCATTCTATGACTGTAGATTTT | CAATCAAGACGTTCTTTCCAGTT   |

## Supplemental Figure S1

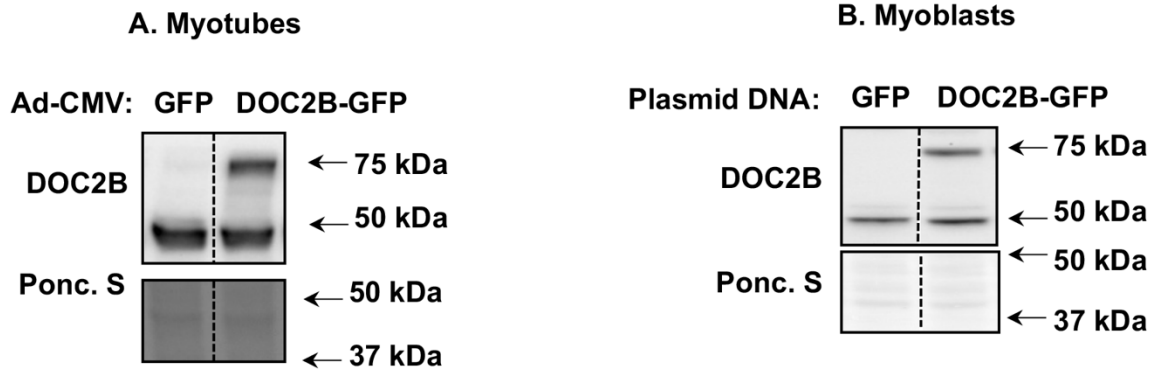

**Figure S1: Validation of DOC2B overexpression in L6-GLUT4myc cells.** A-B) Immunoblot analysis of DOC-GFP expression in control GFP or DOC2B-GFP adenovirus-transduced L6-GLUT4myc myotubes (A) and in control GFP or DOC2B-GFP plasmid DNA-transfected L6-GLUT4myc myotubes (B). A representative immunoblot is shown. Black vertical dashed lines indicate splicing of lanes from within the same gel exposure. Ponceau S staining of the full length PVDF membrane was used as a loading control.

## Supplemental Figure S2

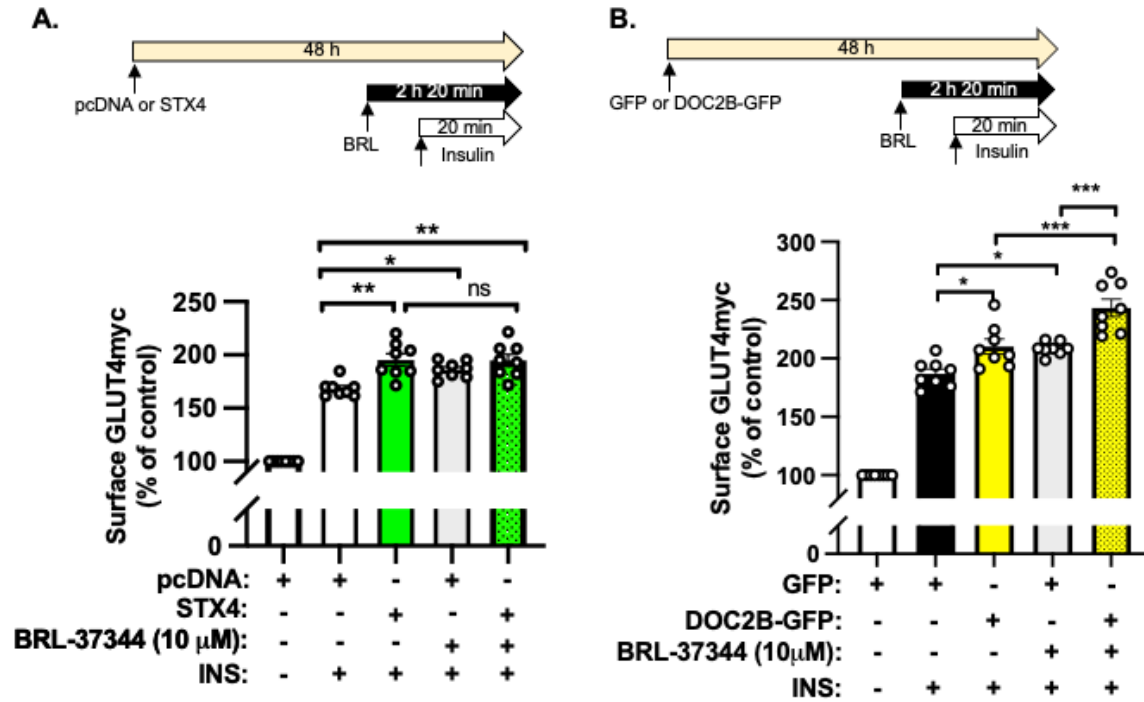

**Figure S2: Effect of Syntaxin 4 (STX4) enrichment with  $\beta$ -AR agonism on insulin-stimulated GLUT4 translocation in L6 myoblasts. (A-B)** L6-GLUT4myc myoblasts were transfected with indicated vector (STX4 vs. pcDNA [control] or DOC2B-GFP vs. GFP [control]) were treated with  $\pm$   $\beta$ -AR agonist (BRL-37344) and then stimulated with  $\pm$  insulin (INS). **(A)** Quantification of GLUT4myc levels at the plasma membrane (PM) with  $\pm$  STX4 enrichment under stated conditions (n=8 independent experiments). **(B)** Quantification of GLUT4myc levels at the PM with  $\pm$  DOC2B enrichment under stated conditions (n=8 independent experiments). N.S., Not Significant. \*p<0.05, \*\*p<0.01, \*\*\*p<0.001.

### Supplemental Figure S3

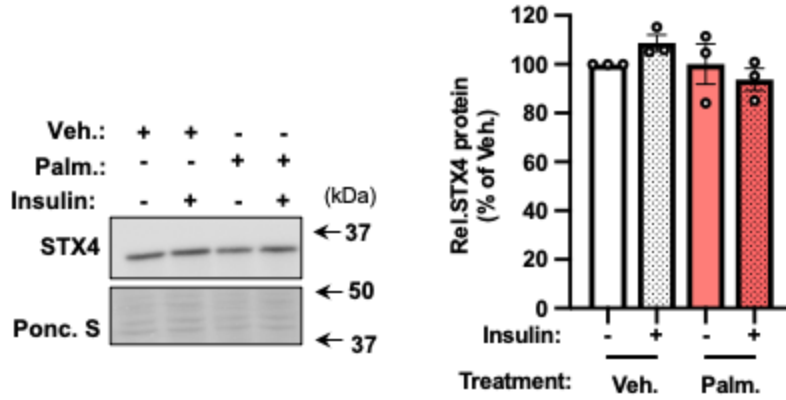

**Figure S3: Effect of Palm-stress on STX4 protein abundance.** Immunoblot analysis and quantification of STX4 protein abundance in L6-GLUT4myc myotubes  $\pm$  palmitate (Palm)-stress (n=3 independent experiments). A representative immunoblot is shown. Ponceau S (Ponc. S) staining of the full length PVDF membrane was used as loading control.

## Supplementary Methods

**Overexpression *DOC2B* or *STX4* and pharmacologic intervention** - The L6-GLUT4myc myoblasts at 70% confluence were transfected with 0.5  $\mu$ g of rDOC2B-GFP or pcDNA-rSTX4, or the control plasmid DNA (GFP or pcDNA) in 24-well plates using L6 Cell Avalanche™ Transfection Reagent (EZ biosystems, MD, USA, cat# EZT-L600-1) for 6 h according to the manufacturer's protocol, washed with PBS to remove any free complex, and then further cultured for 48 h. To test for synergistic effects of DOC2B or STX4 with  $\beta_2/\beta_3$ -adrenergic receptor agonist (BRL-37344, R&D Systems, cat# 0948), cells were treated with BRL-37344 (10  $\mu$ M) for 2 h in serum-free medium and were then stimulated with or without insulin (100 nM) for 20 min. Palm-induced stress was carried out by treating L6-GLUT4myc myoblasts with 200  $\mu$ M of Palmitate for 24 h after the initial 24 h of transfection.

**Immunoblotting** - After Palmitate or BSA treatment for 24 h, L6-GLUT4myc myotubes were subsequently lysed with 1% Nonidet P-40 lysis buffer (25 mM HEPES pH 7.4, 1% Nonidet P-40, 10% glycerol, 137 mM NaCl, 1 mM sodium vanadate, 50 mM NaF, 10 mM NaPP, 10  $\mu$ g/ml aprotinin, 5  $\mu$ g/ml leupeptin, 1  $\mu$ g/ml pepstatin, and 1 mM phenylmethylsulfonyl fluoride). Protein concentrations were determined by the BCA assay. Samples were boiled for 5 min with 6x Laemmli SDS sample buffer (Bioland Scientific LLC, Paramount, CA, USA) at 100°C. The proteins were resolved by 10% SDS-PAGE gels and transferred onto PVDF membranes. Following the transfer, the membranes were blocked in 5% skim milk in TBST (10 mM Tris-HCL, pH 7.4, 150 mM NaCl, and 0.1% Tween 20) for 1 h at room temperature. The membranes were incubated with the indicated primary antibodies for 2 h at room temperature or at 4°C overnight: STX4 (custom synthesized as described [1], 1:5000). Then, membranes were incubated for 1 h at

room temperature with a horseradish peroxidase-conjugated goat anti-rabbit IgG (HL) (Bio-Rad, cat#172-1019) or goat anti-mouse (HL) (Bio-Rad, cat # 172-1011). Chemiluminescence was documented using a Bio-Rad ChemiDoc Touch and ECL (Amersham ECL Western Blotting detection reagent, GE Healthcare, cat# RPN2106). Densitometric analysis of bands of interest was performed using Image Lab software (Bio-Rad).

**Supplemental reference:**

1. Wiseman, D.A.; Kalwat, M.A.; Thurmond, D.C. Stimulus-induced S-nitrosylation of syntaxin 4 impacts insulin granule exocytosis. *J Biol Chem* **2011**, *286*, 16344-16354, doi: 10.1074/jbc.M110.214031.
